# Supplementary material
Source: PubMed Central journal article supplement (PMC5658016)
Supplement: NIHMS899260-supplement-7.pdf [file NIHMS899260-supplement-7.pdf]

|                | <b>Age (years)</b> | <b>Sex</b> |
|----------------|--------------------|------------|
| <b>CIP</b>     | 71.5 ± 3.2         | 25% Male   |
| <b>AD</b>      | 30.0 ± 14.1        | 50% Male   |
| <b>Control</b> | 72.0 ± 2.1         | 50% Male   |

**Table S1. Demographics of human skin sample donors. Relates to Figure 5.**

Demographics of CIP (N = 4), AD (N = 4), and control skin (N = 4) donors. Age presented as mean ± standard deviation of each group.

| GO Accession Number | Name                                                 | NES      | FDR q-value        |
|---------------------|------------------------------------------------------|----------|--------------------|
| GO:0002682          | regulation of immune system process                  | -8.77036 | < 10 <sup>-5</sup> |
| GO:0002376          | immune system process                                | -8.66961 | < 10 <sup>-5</sup> |
| GO:0080134          | regulation of response to stress                     | -8.02582 | < 10 <sup>-5</sup> |
| GO:0050776          | regulation of immune response                        | -7.8129  | < 10 <sup>-5</sup> |
| GO:0022613          | ribonucleoprotein complex biogenesis                 | -7.7964  | < 10 <sup>-5</sup> |
| GO:0002684          | positive regulation of immune system process         | -7.77017 | < 10 <sup>-5</sup> |
| GO:0006952          | defense response                                     | -7.49978 | < 10 <sup>-5</sup> |
| GO:0044403          | symbiosis, encompassing mutualism through parasitism | -7.30644 | < 10 <sup>-5</sup> |
| GO:0050778          | positive regulation of immune response               | -7.20636 | < 10 <sup>-5</sup> |
| GO:0044419          | interspecies interaction between organisms           | -7.18966 | < 10 <sup>-5</sup> |
| GO:0042254          | ribosome biogenesis                                  | -7.11062 | < 10 <sup>-5</sup> |
| GO:0031347          | regulation of defense response                       | -7.10497 | < 10 <sup>-5</sup> |
| GO:0048584          | positive regulation of response to stimulus          | -7.05507 | < 10 <sup>-5</sup> |
| GO:0006396          | RNA processing                                       | -7.04048 | < 10 <sup>-5</sup> |
| GO:0009607          | response to biotic stimulus                          | -6.93027 | < 10 <sup>-5</sup> |
| GO:0043604          | amide biosynthetic process                           | -6.89239 | < 10 <sup>-5</sup> |
| GO:0034660          | ncRNA metabolic process                              | -6.8318  | < 10 <sup>-5</sup> |
| GO:0006955          | immune response                                      | -6.73395 | < 10 <sup>-5</sup> |
| GO:0002253          | activation of immune response                        | -6.70878 | < 10 <sup>-5</sup> |
| GO:0006518          | peptide metabolic process                            | -6.6791  | < 10 <sup>-5</sup> |
| GO:0016072          | rRNA metabolic process                               | -6.56767 | < 10 <sup>-5</sup> |
| GO:1901564          | organonitrogen compound metabolic process            | -6.55732 | < 10 <sup>-5</sup> |
| GO:0019058          | viral life cycle                                     | -6.53858 | < 10 <sup>-5</sup> |
| GO:0031349          | positive regulation of defense response              | -6.52802 | < 10 <sup>-5</sup> |
| GO:0034470          | ncRNA processing                                     | -6.35599 | < 10 <sup>-5</sup> |
| GO:1901566          | organonitrogen compound biosynthetic process         | -6.31783 | < 10 <sup>-5</sup> |
| GO:0043603          | cellular amide metabolic process                     | -6.24033 | < 10 <sup>-5</sup> |
| GO:0061024          | membrane organization                                | -6.19839 | < 10 <sup>-5</sup> |
| GO:0032101          | regulation of response to external stimulus          | -6.11073 | < 10 <sup>-5</sup> |
| GO:0045184          | establishment of protein localization                | -6.09473 | < 10 <sup>-5</sup> |
| GO:0071310          | cellular response to organic substance               | -6.08981 | < 10 <sup>-5</sup> |
| GO:0002218          | activation of innate immune response                 | -6.07281 | < 10 <sup>-5</sup> |
| GO:0034097          | response to cytokine                                 | -6.07209 | < 10 <sup>-5</sup> |
| GO:0009057          | macromolecule catabolic process                      | -6.07098 | < 10 <sup>-5</sup> |
| GO:0045089          | positive regulation of innate immune response        | -6.04607 | < 10 <sup>-5</sup> |
| GO:0051649          | establishment of localization in cell                | -6.03101 | < 10 <sup>-5</sup> |
| GO:0007005          | mitochondrion organization                           | -6.02195 | < 10 <sup>-5</sup> |
| GO:0008104          | protein localization                                 | -6.0172  | < 10 <sup>-5</sup> |
| GO:0045088          | regulation of innate immune response                 | -5.9712  | < 10 <sup>-5</sup> |
| GO:0065003          | macromolecular complex assembly                      | -5.95253 | < 10 <sup>-5</sup> |
| GO:0071822          | protein complex subunit organization                 | -5.90784 | < 10 <sup>-5</sup> |
| GO:1902580          | single-organism cellular localization                | -5.87975 | < 10 <sup>-5</sup> |
| GO:0070727          | cellular macromolecule localization                  | -5.83766 | < 10 <sup>-5</sup> |
| GO:0010941          | regulation of cell death                             | -5.80849 | < 10 <sup>-5</sup> |
| GO:0031399          | regulation of protein modification process           | -5.80517 | < 10 <sup>-5</sup> |
| GO:0009617          | response to bacterium                                | -5.7918  | < 10 <sup>-5</sup> |
| GO:0006413          | translational initiation                             | -5.75062 | < 10 <sup>-5</sup> |
| GO:0051247          | positive regulation of protein metabolic process     | -5.73842 | < 10 <sup>-5</sup> |
| GO:0009605          | response to external stimulus                        | -5.73487 | < 10 <sup>-5</sup> |

**Table S2. AD skin demonstrates enrichment of immune activation pathways. Relates to Figure 5.**

List of top 50 biological process GO terms enriched in AD in a direct comparison of CIP and AD as determined by gene set enrichment analysis (GSEA). Normalized enrichment score (NES) and false discovery rate (FDR) q-value of individual GO terms are provided.

| GO Accession Number | Name                                                                             | NES      | FDR q-value |
|---------------------|----------------------------------------------------------------------------------|----------|-------------|
| GO:0032990          | cell part morphogenesis                                                          | 3.093461 | 0.002029    |
| GO:0044782          | cilium organization                                                              | 2.879501 | 0.002522    |
| GO:0060271          | cilium morphogenesis                                                             | 2.867324 | 0.002018    |
| GO:0008589          | regulation of smoothened signaling pathway                                       | 2.766102 | 0.003024    |
| GO:0016054          | organic acid catabolic process                                                   | 2.669138 | 0.006637    |
| GO:0046395          | carboxylic acid catabolic process                                                | 2.666201 | 0.005615    |
| GO:0051965          | positive regulation of synapse assembly                                          | 2.584534 | 0.010122    |
| GO:0016339          | calcium-dependent cell-cell adhesion via plasma membrane cell adhesion molecules | 2.545489 | 0.011865    |
| GO:0033539          | fatty acid beta-oxidation using acyl-CoA dehydrogenase                           | 2.528827 | 0.012158    |
| GO:0010927          | cellular component assembly involved in morphogenesis                            | 2.521315 | 0.011644    |
| GO:0048667          | cell morphogenesis involved in neuron differentiation                            | 2.399559 | 0.028197    |
| GO:0072329          | monocarboxylic acid catabolic process                                            | 2.391039 | 0.027353    |
| GO:0007156          | homophilic cell adhesion via plasma membrane adhesion molecules                  | 2.374797 | 0.027991    |
| GO:0097485          | neuron projection guidance                                                       | 2.356602 | 0.029745    |
| GO:0098742          | cell-cell adhesion via plasma-membrane adhesion molecules                        | 2.32599  | 0.035653    |
| GO:0051298          | centrosome duplication                                                           | 2.27191  | 0.048845    |
| GO:0009062          | fatty acid catabolic process                                                     | 2.266665 | 0.047421    |
| GO:0061512          | protein localization to cilium                                                   | 2.250689 | 0.050193    |
| GO:0030030          | cell projection organization                                                     | 2.228846 | 0.055343    |
| GO:0003002          | regionalization                                                                  | 2.225651 | 0.053408    |
| GO:0050807          | regulation of synapse organization                                               | 2.176872 | 0.069665    |
| GO:0007224          | smoothened signaling pathway                                                     | 2.16341  | 0.072499    |
| GO:0048812          | neuron projection morphogenesis                                                  | 2.149574 | 0.076482    |
| GO:0019228          | neuronal action potential                                                        | 2.135246 | 0.080783    |
| GO:0071236          | cellular response to antibiotic                                                  | 2.118108 | 0.08638     |
| GO:0021915          | neural tube development                                                          | 2.111597 | 0.086502    |
| GO:0021522          | spinal cord motor neuron differentiation                                         | 2.103877 | 0.087523    |
| GO:0007600          | sensory perception                                                               | 2.094911 | 0.089596    |
| GO:0007389          | pattern specification process                                                    | 2.093567 | 0.087319    |
| GO:0050953          | sensory perception of light stimulus                                             | 2.082521 | 0.090076    |
| GO:0021510          | spinal cord development                                                          | 2.050129 | 0.106422    |
| GO:0000732          | strand displacement                                                              | 2.047653 | 0.104586    |
| GO:0045494          | photoreceptor cell maintenance                                                   | 2.045306 | 0.103041    |
| GO:0032989          | cellular component morphogenesis                                                 | 2.042259 | 0.10153     |
| GO:0021515          | cell differentiation in spinal cord                                              | 2.028853 | 0.107171    |
| GO:0019748          | secondary metabolic process                                                      | 2.026103 | 0.10577     |
| GO:1903825          | organic acid transmembrane transport                                             | 2.017075 | 0.108687    |
| GO:0035058          | nonmotile primary cilium assembly                                                | 2.012586 | 0.108942    |
| GO:0060401          | cytosolic calcium ion transport                                                  | 1.995952 | 0.117028    |
| GO:0097553          | calcium ion transmembrane import into cytosol                                    | 1.986171 | 0.121127    |
| GO:0031023          | microtubule organizing center organization                                       | 1.977455 | 0.124149    |
| GO:0007517          | muscle organ development                                                         | 1.97117  | 0.125907    |
| GO:1902656          | calcium ion import into cytosol                                                  | 1.970663 | 0.123353    |
| GO:0007098          | centrosome cycle                                                                 | 1.96972  | 0.121292    |
| GO:0086010          | membrane depolarization during action potential                                  | 1.964156 | 0.122664    |
| GO:0098534          | centriole assembly                                                               | 1.960917 | 0.122407    |
| GO:0070509          | calcium ion import                                                               | 1.959427 | 0.121073    |
| GO:0009953          | dorsal/ventral pattern formation                                                 | 1.955245 | 0.121612    |
| GO:0097237          | cellular response to toxic substance                                             | 1.954725 | 0.119552    |

**Table S3. CIP skin demonstrates enrichment of transcriptional programs not associated with inflammation. Relates to Figure 5.**

List of top 50 biological process GO terms enriched in CIP in a direct comparison of CIP and AD as determined by gene set enrichment analysis (GSEA). Normalized enrichment score (NES) and false discovery rate (FDR) q-value of individual GO terms are provided.

|                  | Age | Sex | History of AD | History of malignancy | Previously failed treatments |               |                                            |            |                 |                  |               |
|------------------|-----|-----|---------------|-----------------------|------------------------------|---------------|--------------------------------------------|------------|-----------------|------------------|---------------|
|                  |     |     |               |                       | Topical steroids             | Oral steroids | Additional Immuno-suppression <sup>a</sup> | Gabapentin | Anti-histamines | Anti-depressants | Photo-therapy |
| <b>Patient 1</b> | 79  | M   | None          | None                  | Yes                          | Yes           | Yes                                        | Yes        | Yes             | Yes              | N/A           |
| <b>Patient 2</b> | 50  | F   | None          | None                  | Yes                          | Yes           | N/A                                        | N/A        | Yes             | N/A              | N/A           |
| <b>Patient 3</b> | 60  | M   | None          | None                  | Yes                          | Yes           | N/A                                        | N/A        | Yes             | N/A              | Yes           |
| <b>Patient 4</b> | 79  | M   | None          | Yes                   | Yes                          | Yes           | Yes                                        | Yes        | N/A             | Yes              | N/A           |
| <b>Patient 5</b> | 75  | F   | None          | Yes                   | Yes                          | Yes           | N/A                                        | N/A        | N/A             | N/A              | Yes           |

<sup>a</sup> azathioprine or cyclosporine

**Table S4. Characteristics of CIP patients treated with tofacitinib. Relates to Figure 6.**

Demographics and relevant medical history including previously failed treatments of CIP patients given tofacitinib. N/A, not applicable.
