# Supplementary material
Source: PubMed Central journal article supplement (PMC5658016)

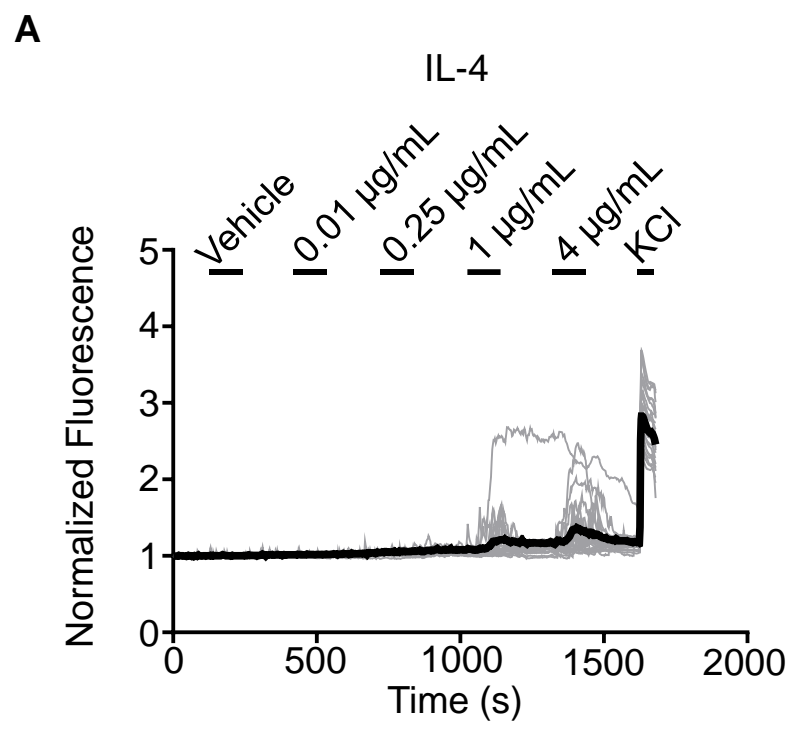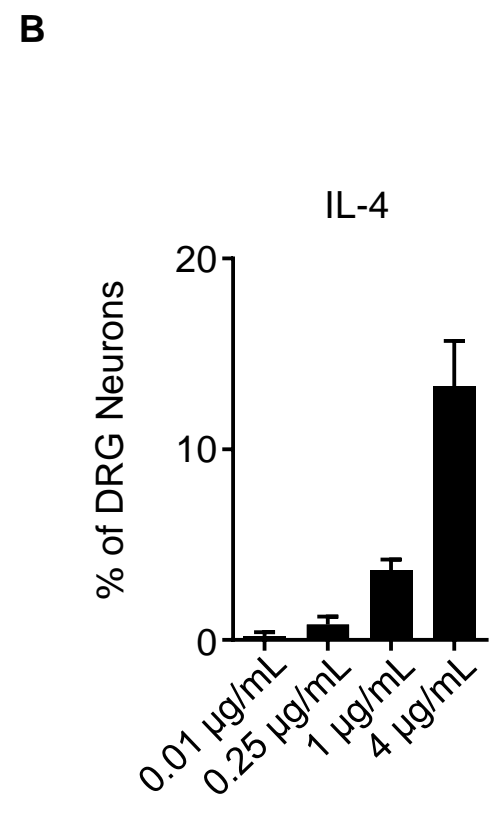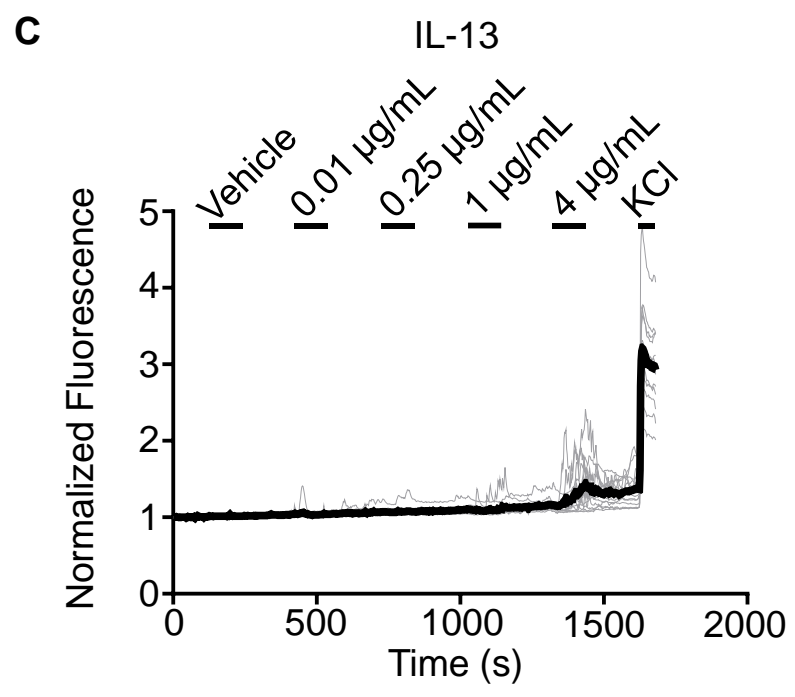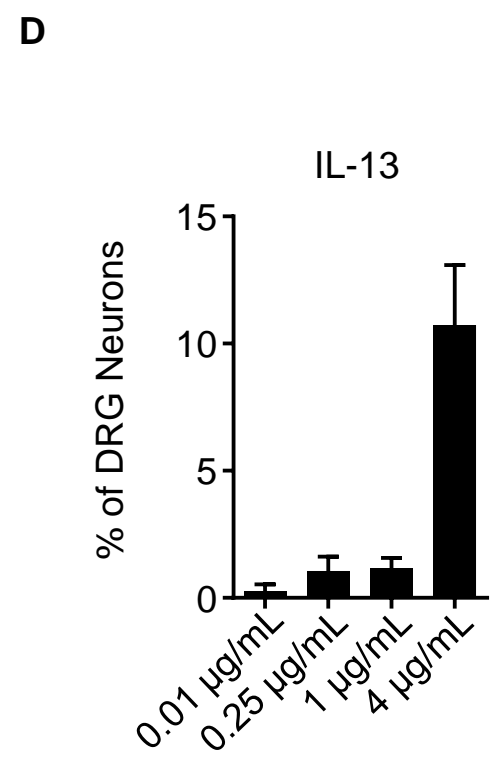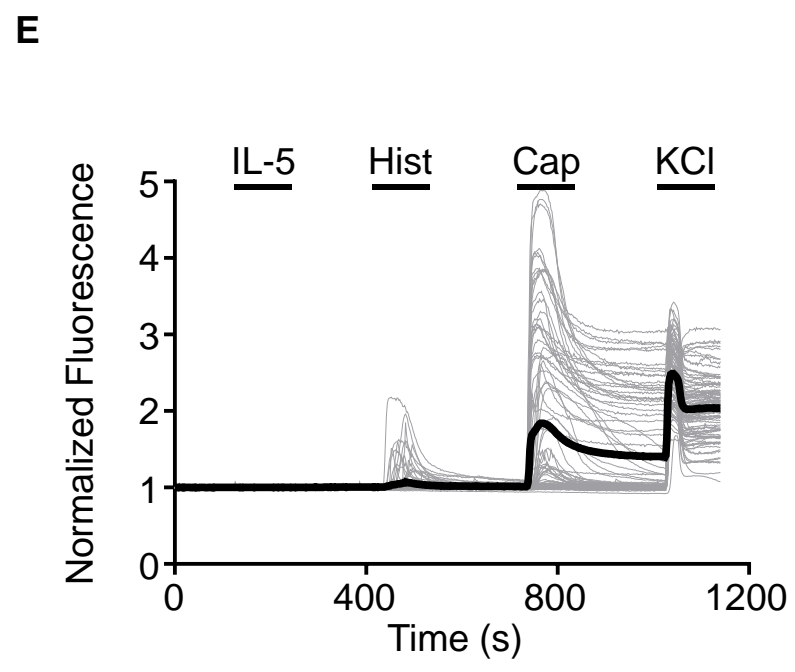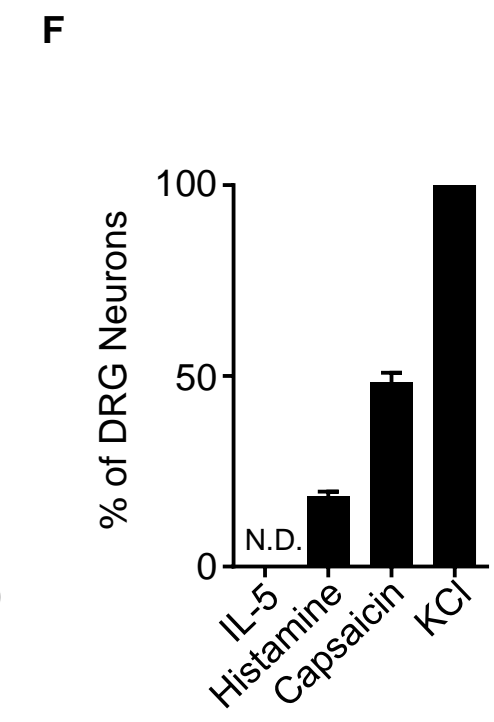

Supplement: NIHMS899260-supplement-1.pdf [file NIHMS899260-supplement-1.pdf]

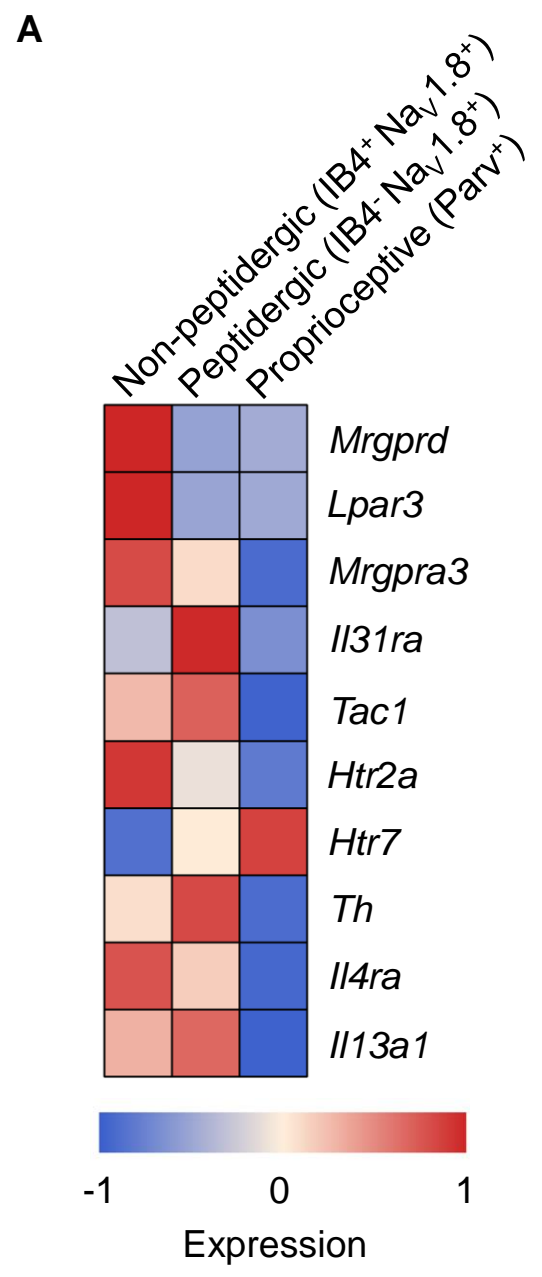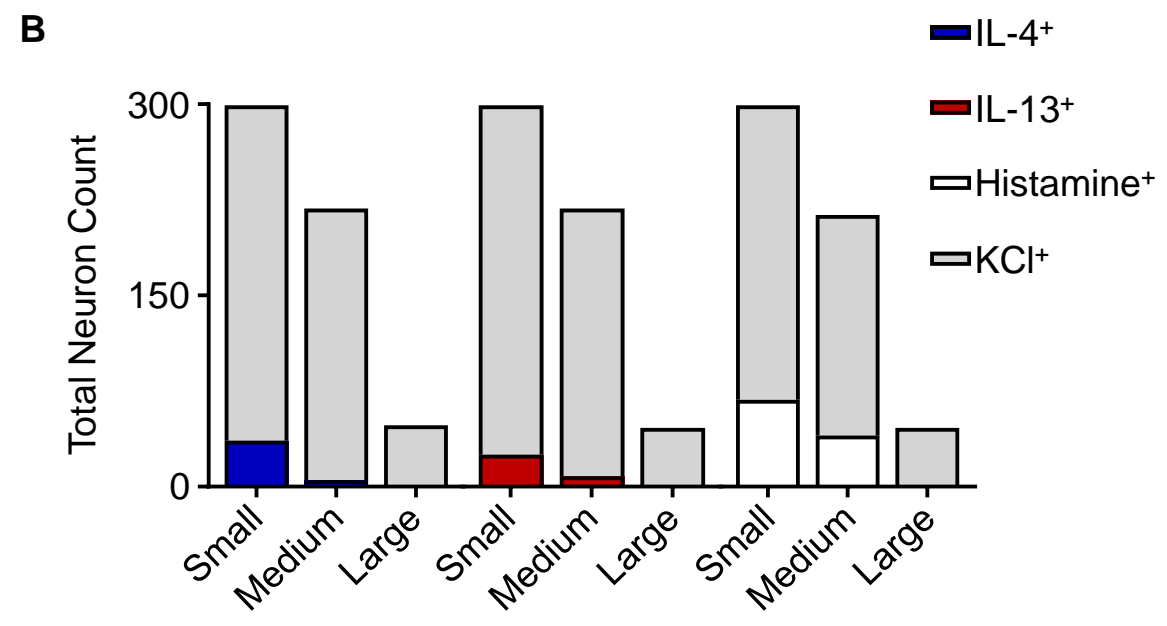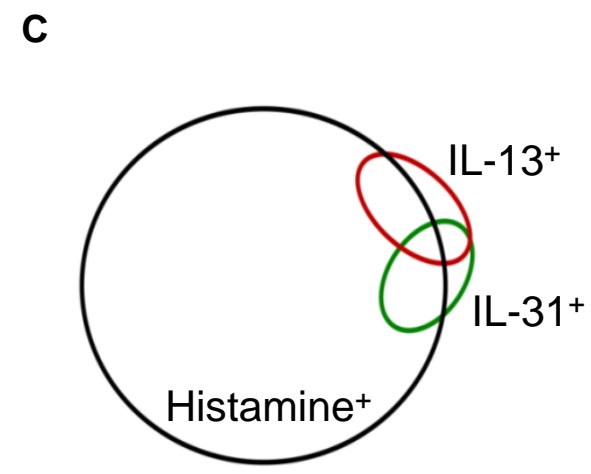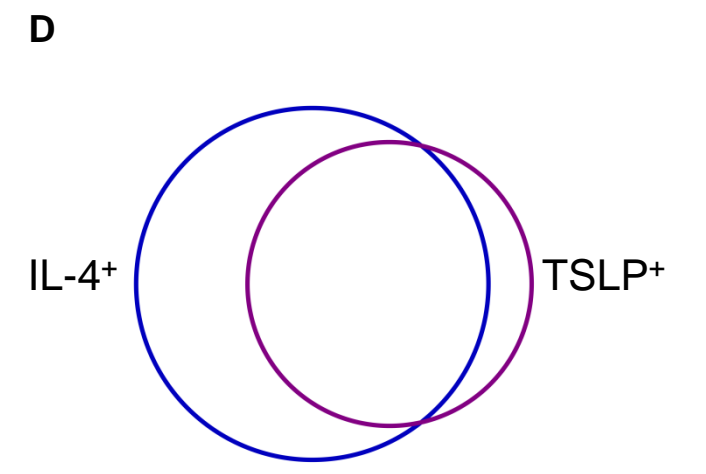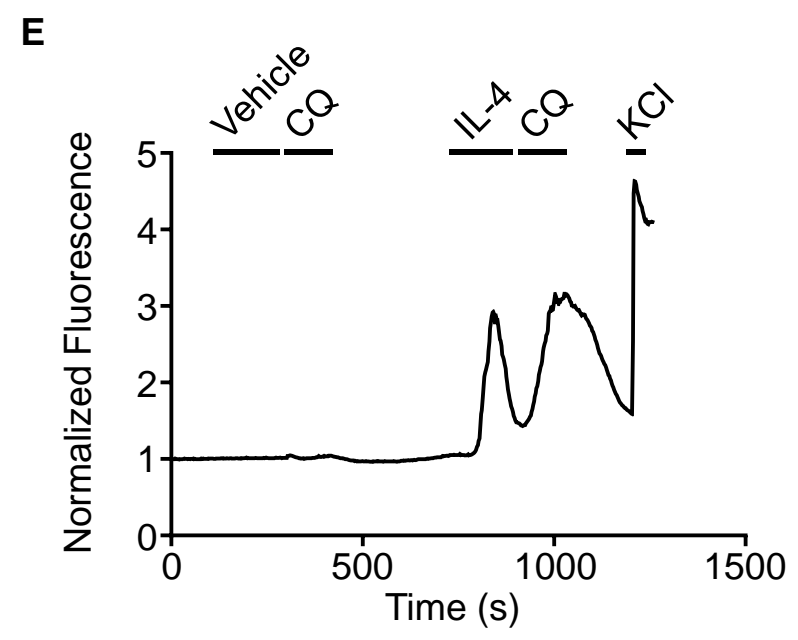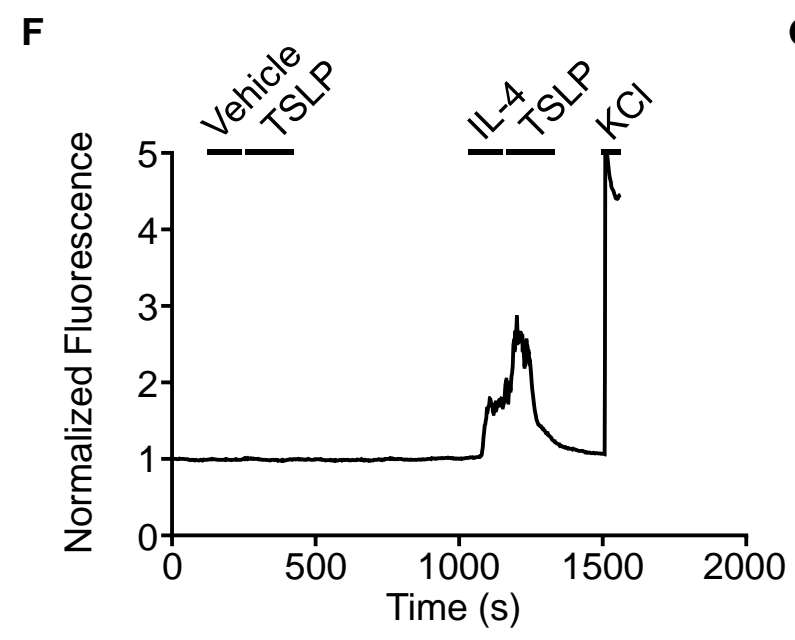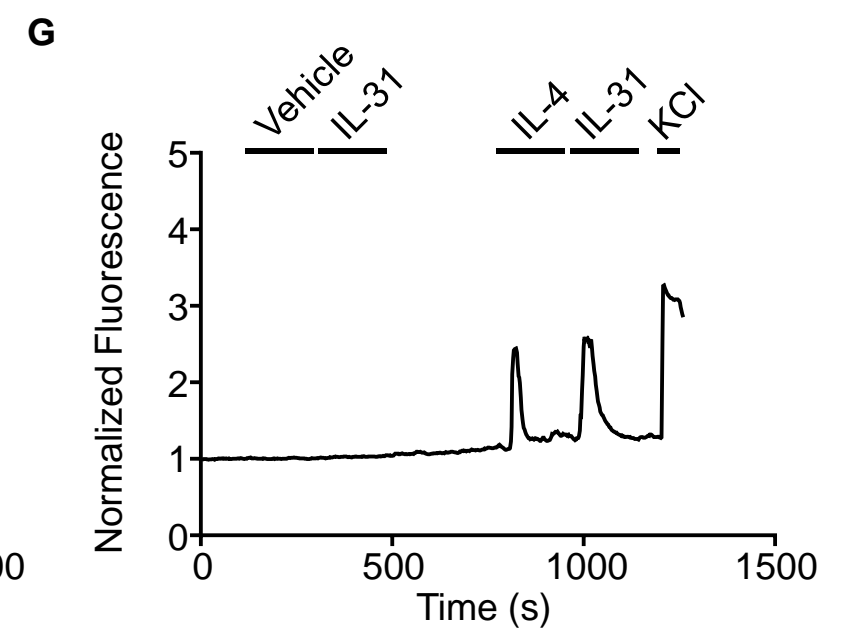

Supplement: NIHMS899260-supplement-2.pdf [file NIHMS899260-supplement-2.pdf]

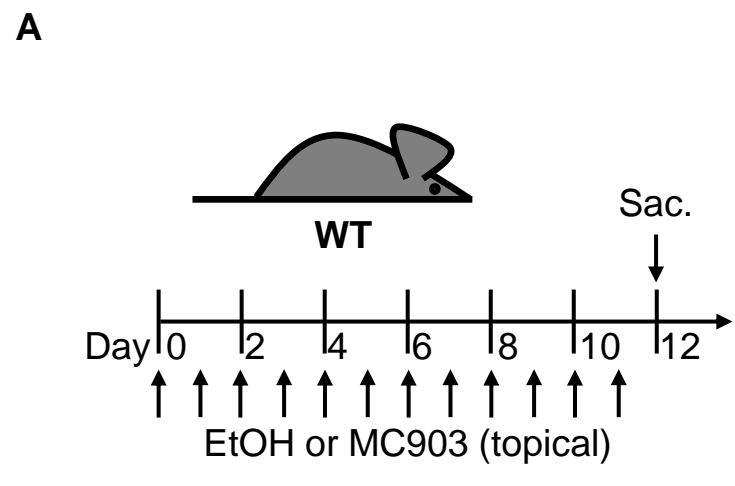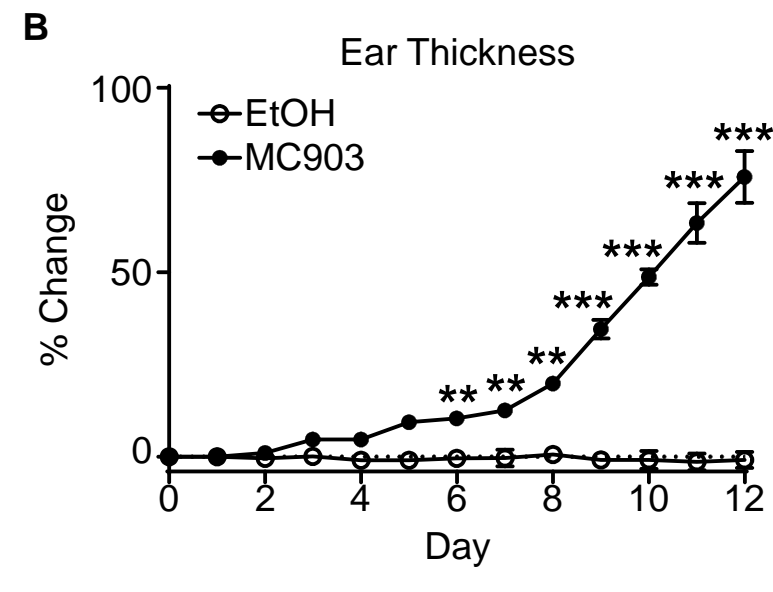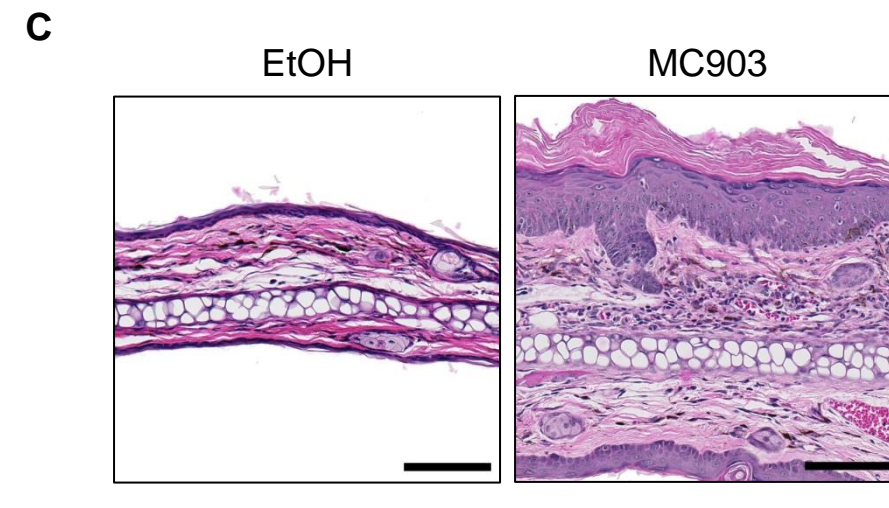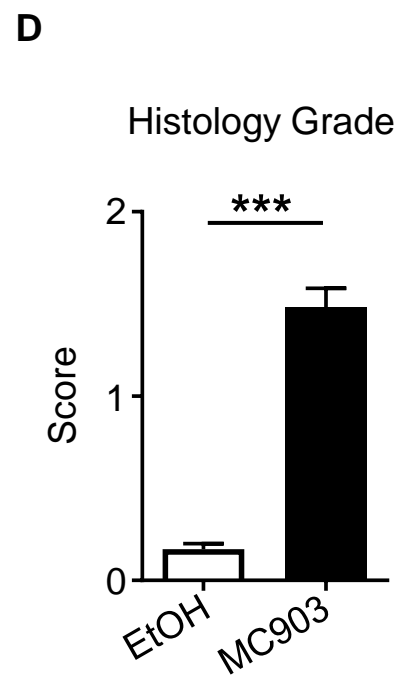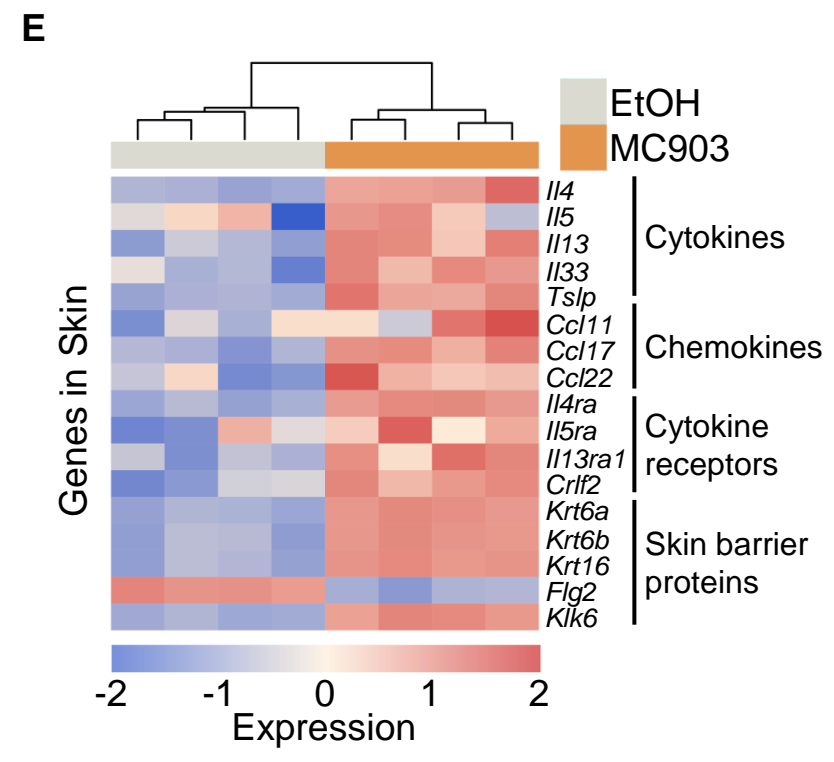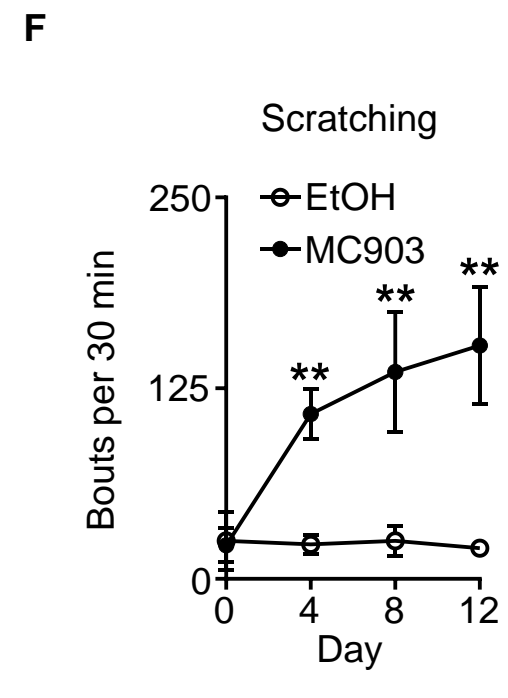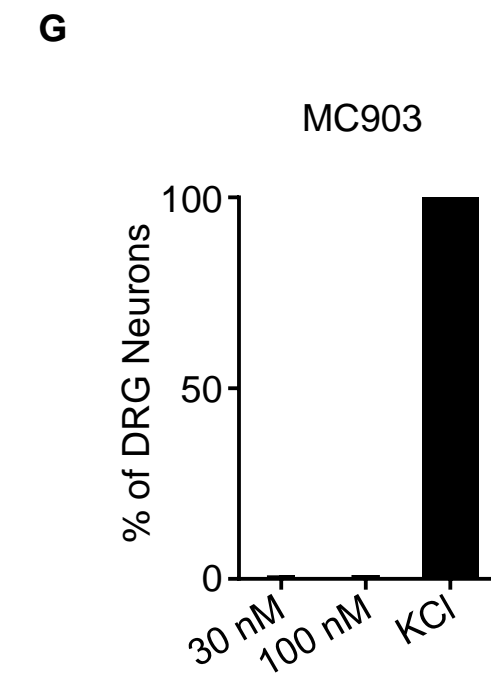

Supplement: NIHMS899260-supplement-3.pdf [file NIHMS899260-supplement-3.pdf]

A

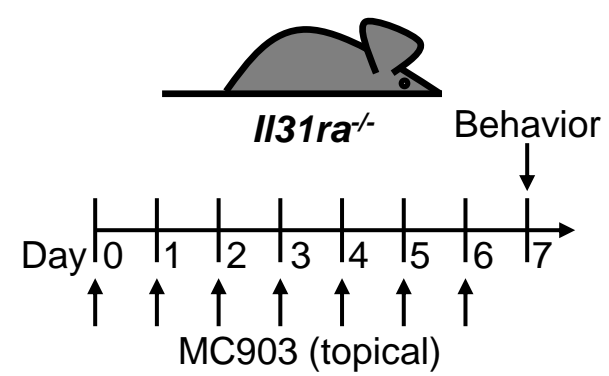

B

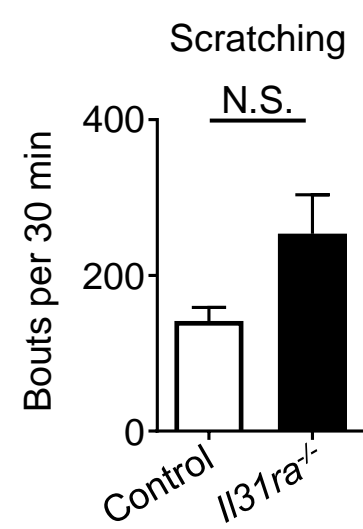

C

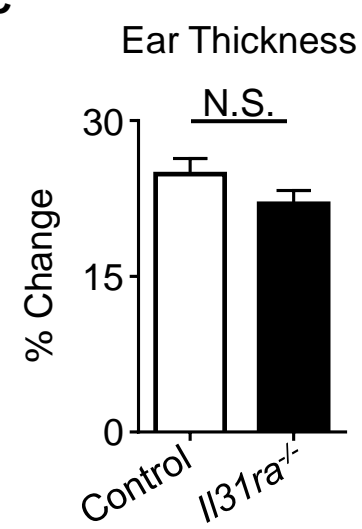

D

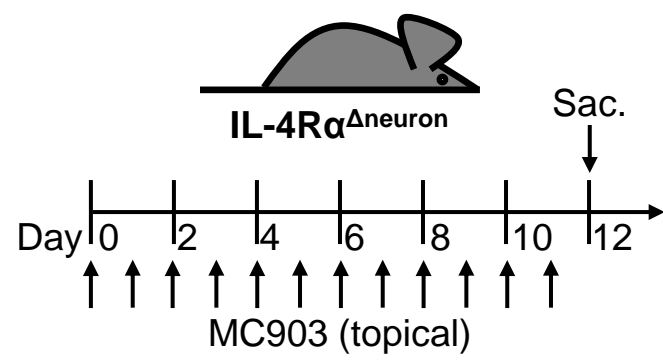

E

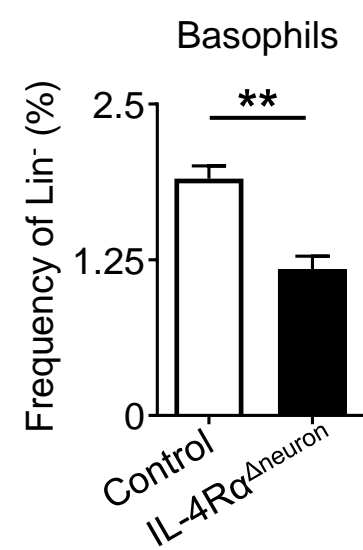

F

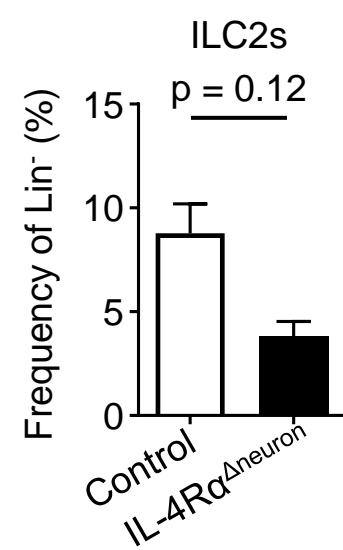

G

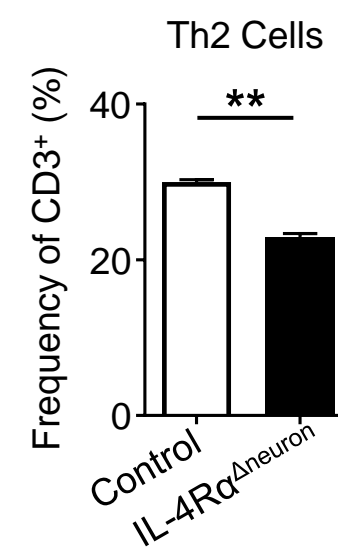

H

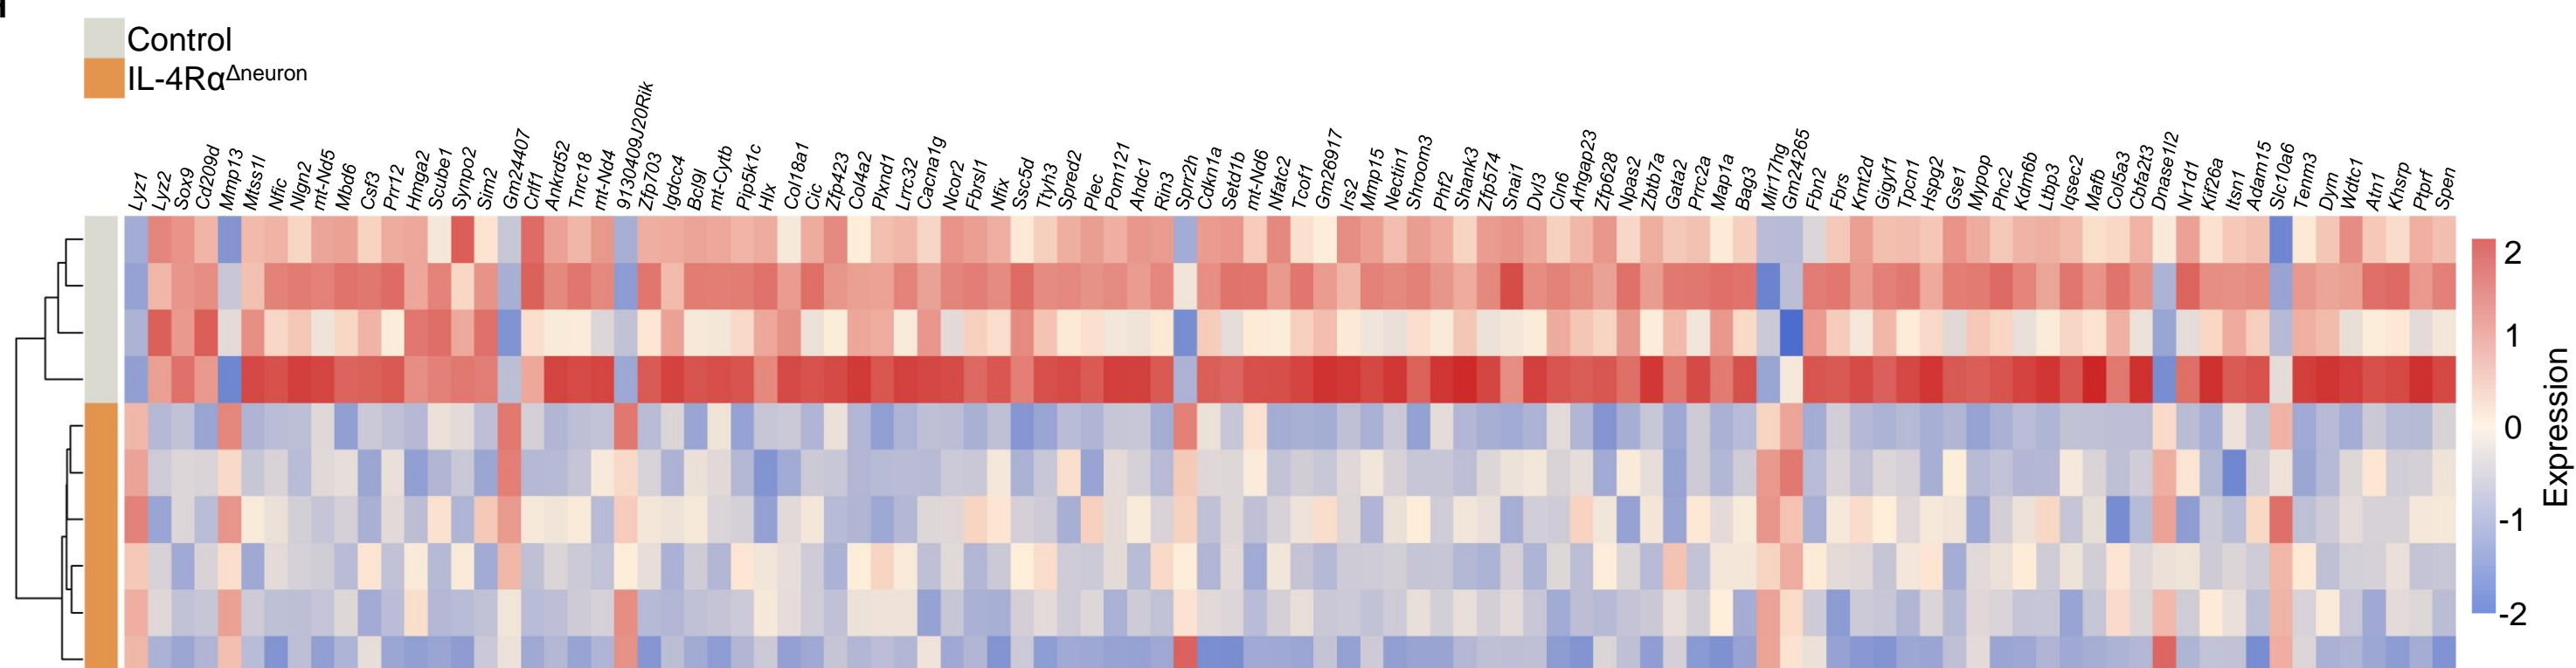

Supplement: NIHMS899260-supplement-4.pdf [file NIHMS899260-supplement-4.pdf]

A

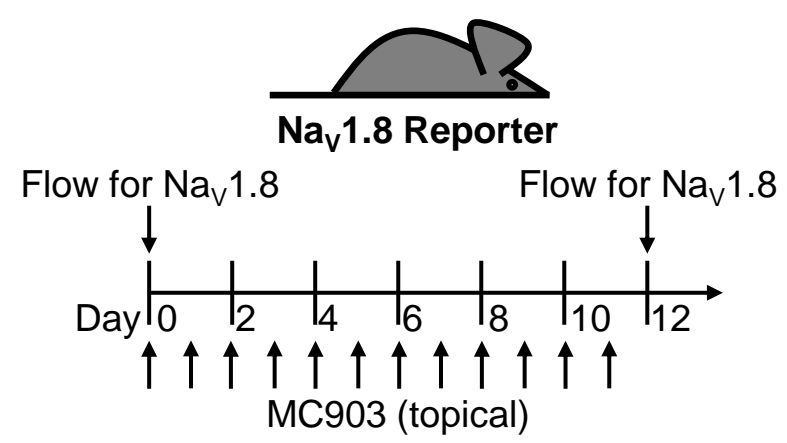

B

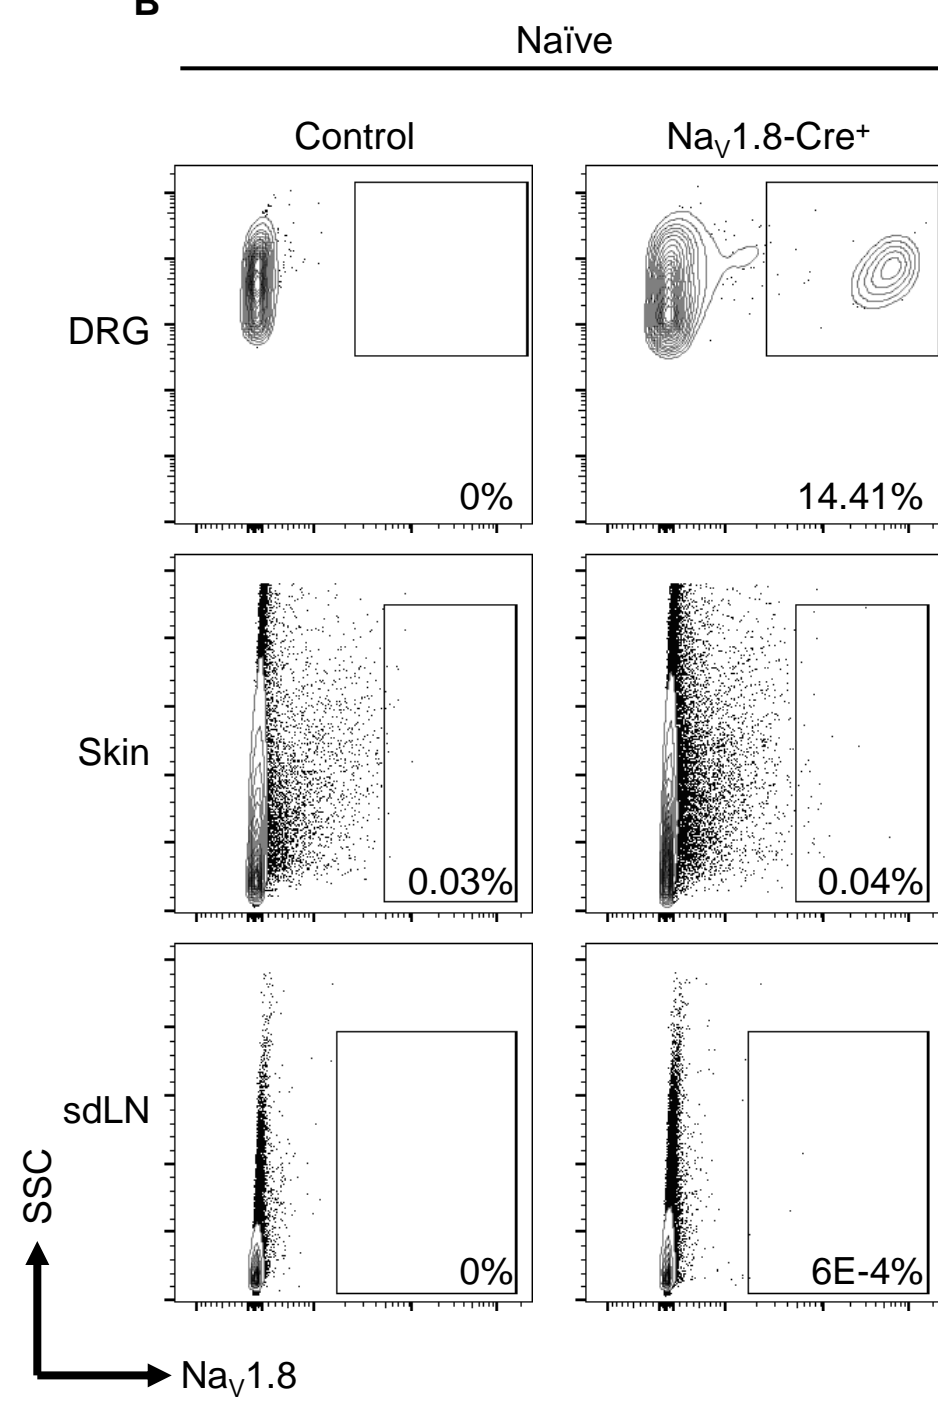

C

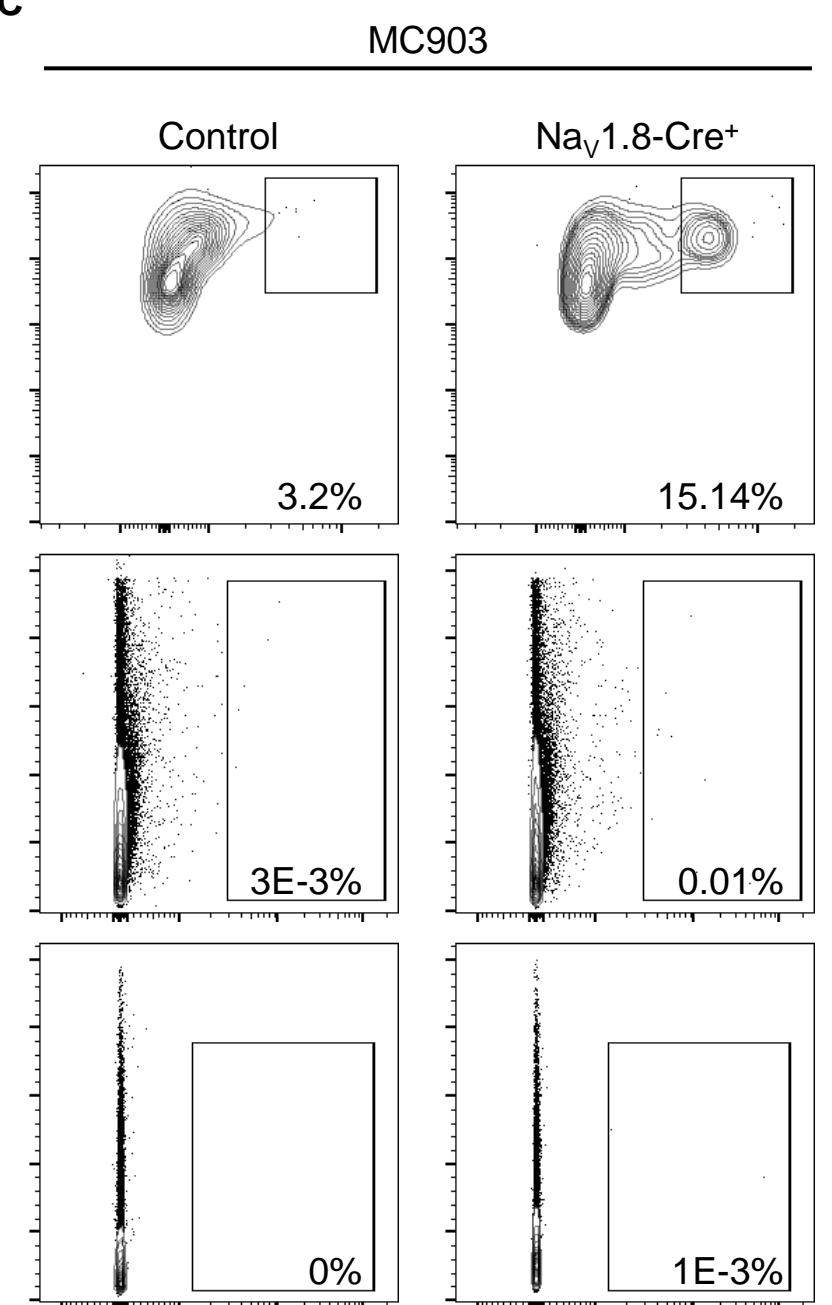

D

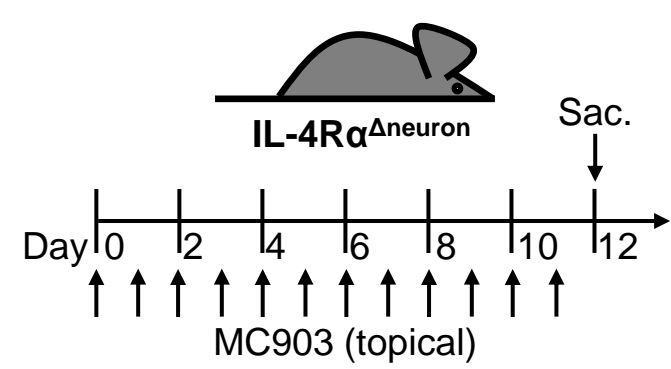

E

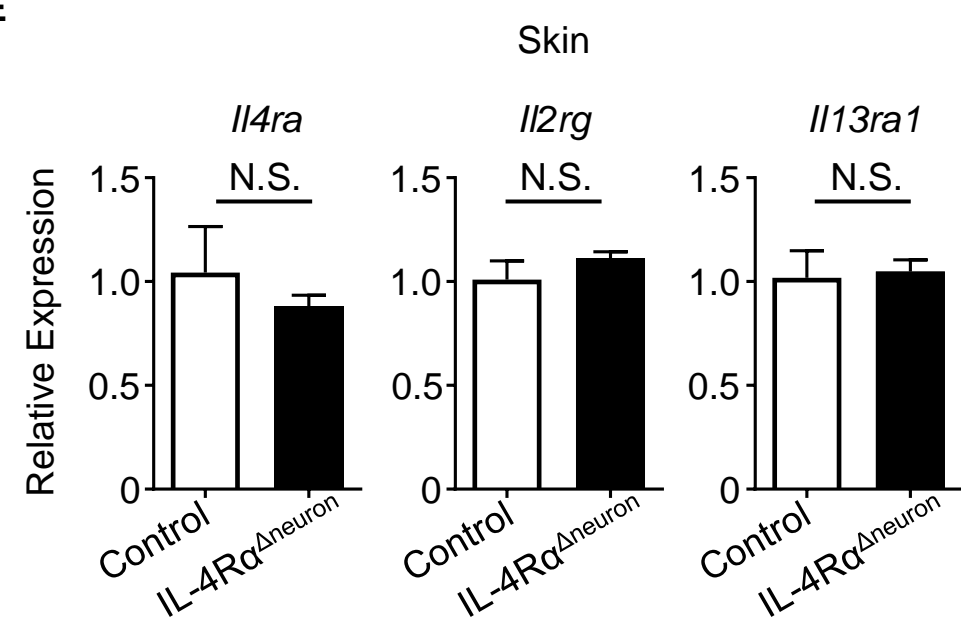

F

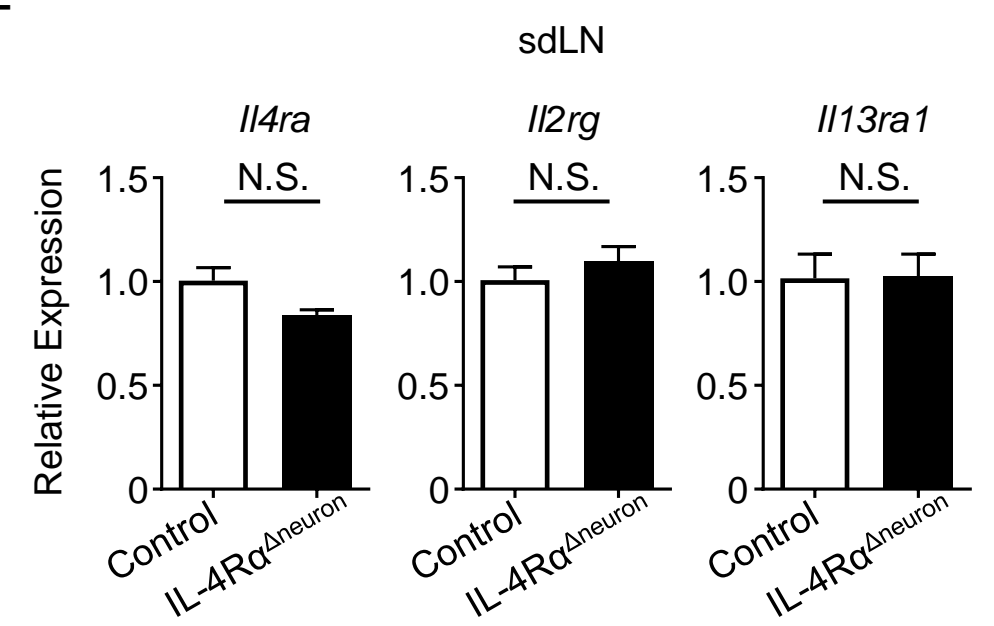

Supplement: NIHMS899260-supplement-5.pdf [file NIHMS899260-supplement-5.pdf]

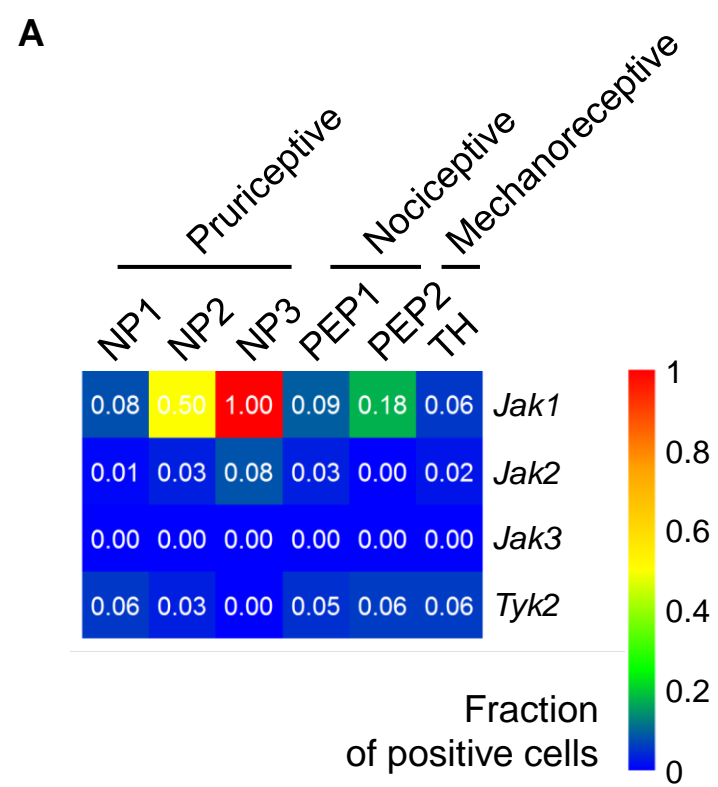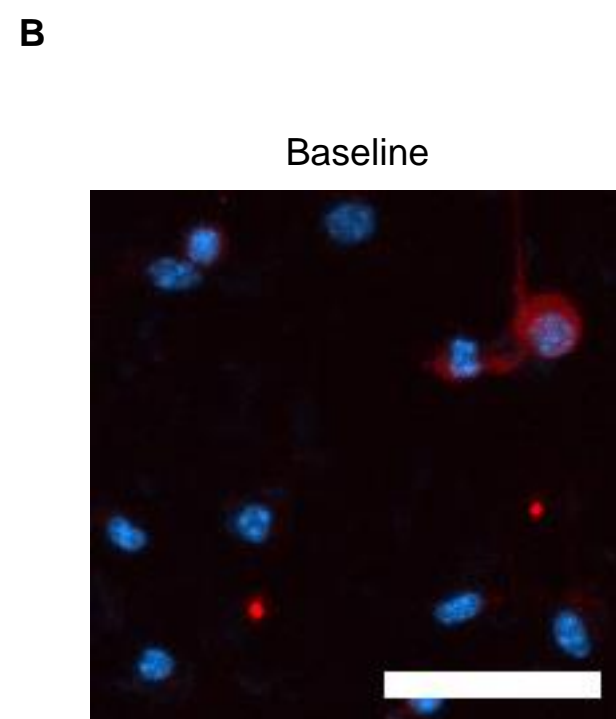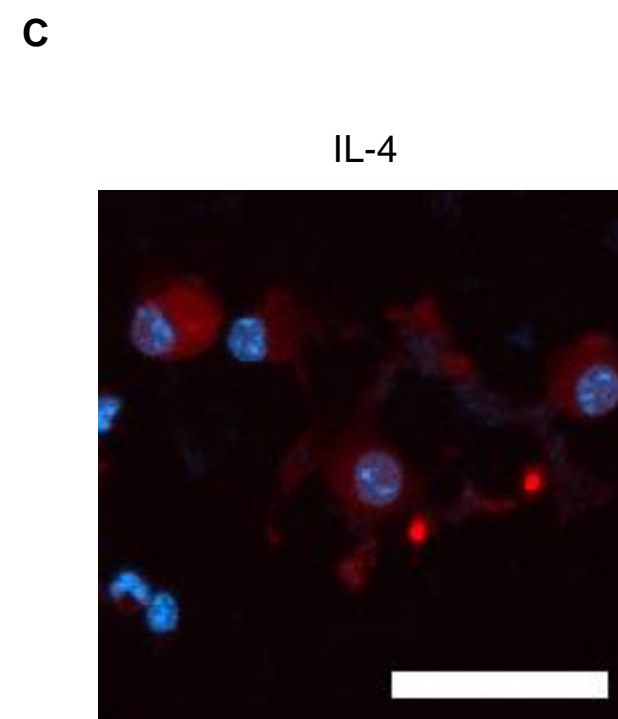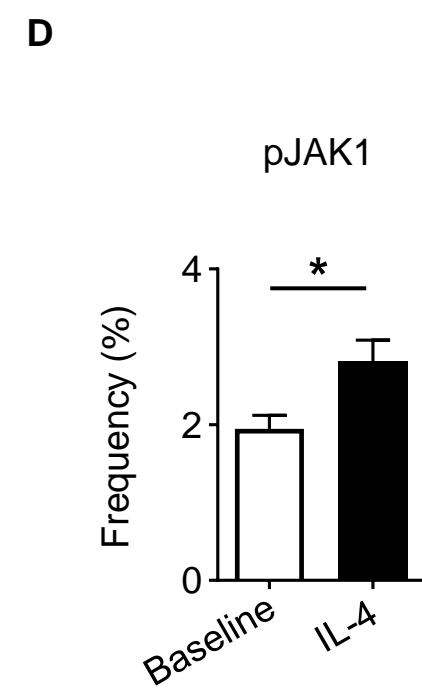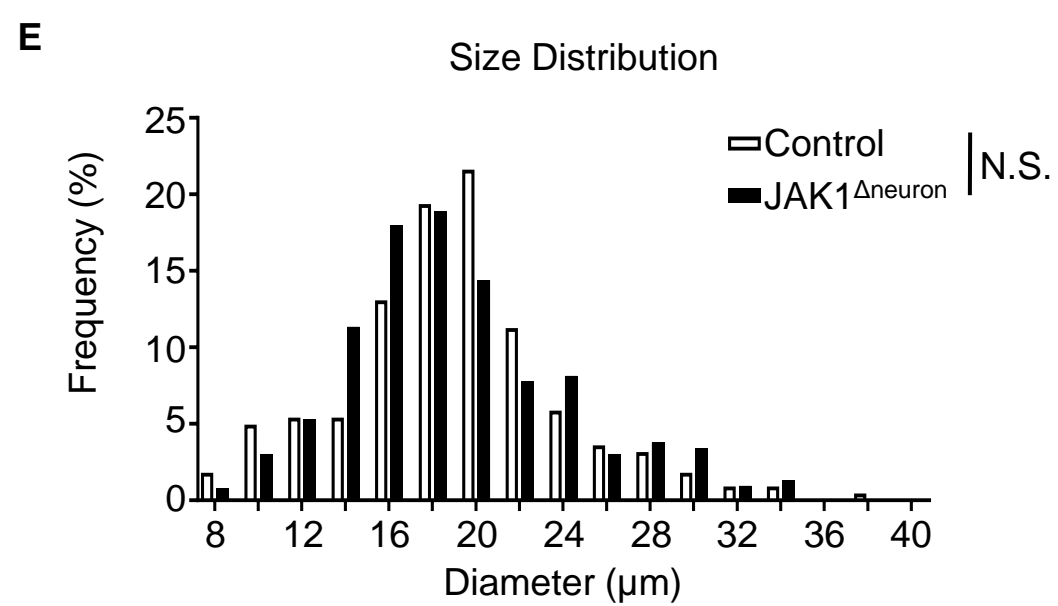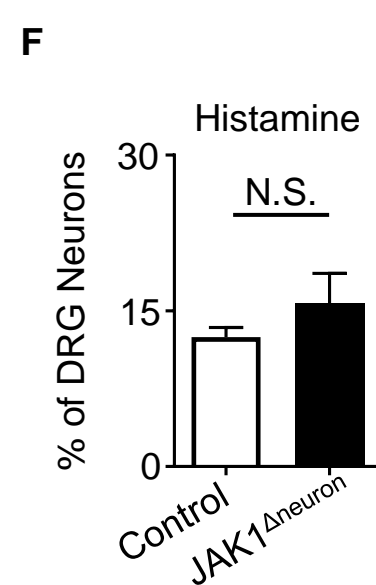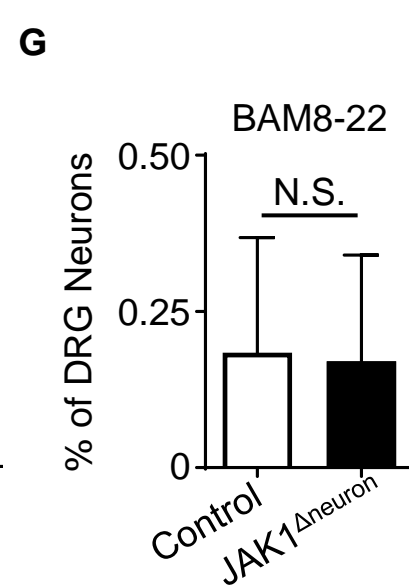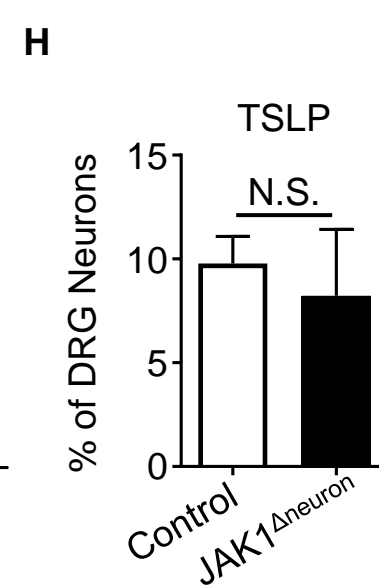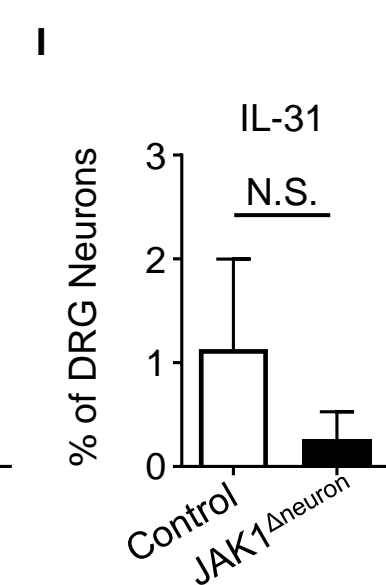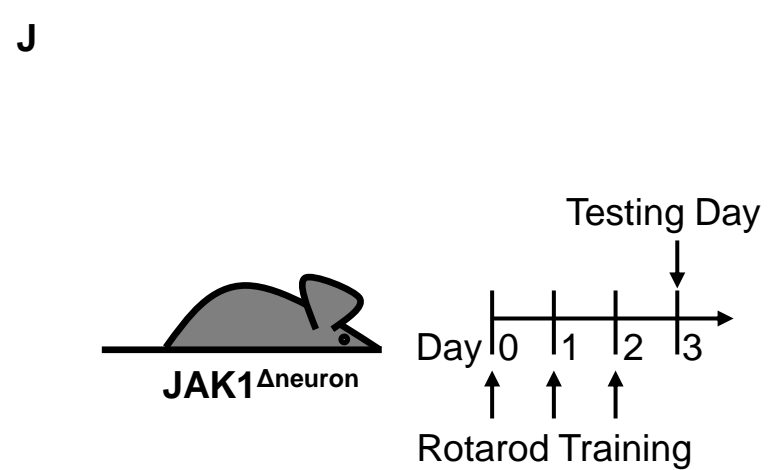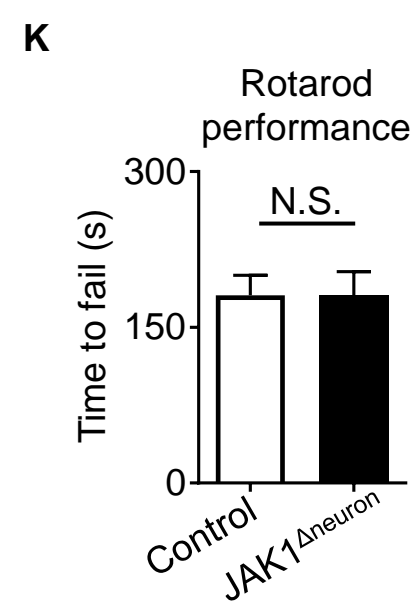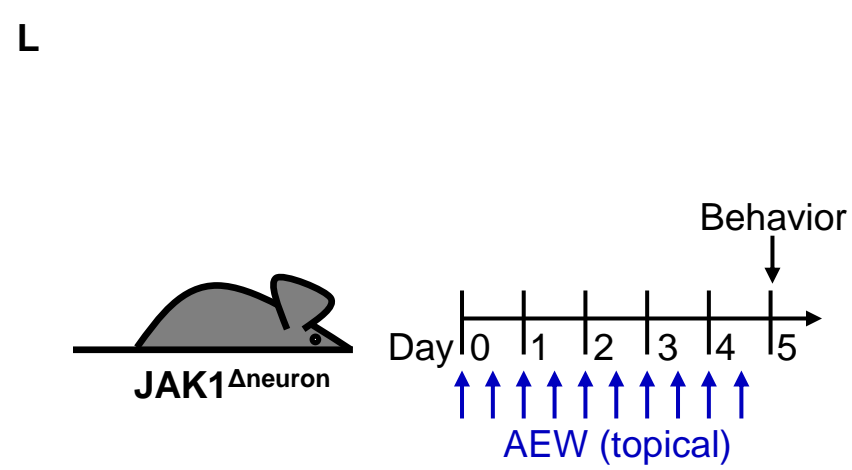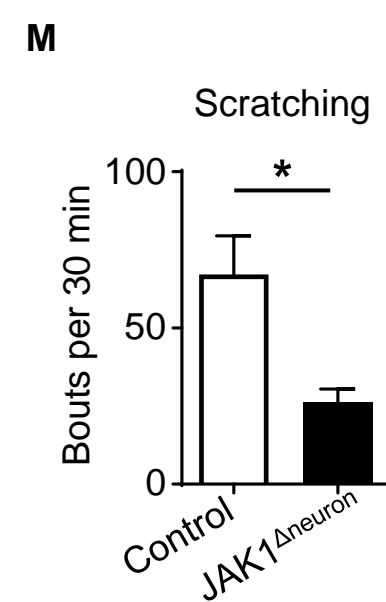

Supplement: NIHMS899260-supplement-6.pdf [file NIHMS899260-supplement-6.pdf]
